# Supplementary material for: Driving offences and risk of subsequent crash in novice drivers: the DRIVE cohort study 12-year follow-up
Source: HighWire-hosted journal article supplement (doi:10.1136/injuryprev-2021-044482), 2022-03-31
Supplement: injuryprev-2021-044482supp001_data_supplement.pdf [file injuryprev-2021-044482supp001_data_supplement.pdf]

## Supplementary data

## Driving offences and risk of subsequent crash in novice drivers. The DRIVE cohort study 12 year follow up.

Table supplement 1: Variables in the analysis, data source, categories and reference. The DRIVE study, NSW, Australia, June 2003–December 2004.

| Variable                                             | Source                                                                                                                                  | Category / unit in the analysis                                                                                                                                                | Reference                                                                                                                                                                                                                                                                                                                                                                                                                                                                                         |
|------------------------------------------------------|-----------------------------------------------------------------------------------------------------------------------------------------|--------------------------------------------------------------------------------------------------------------------------------------------------------------------------------|---------------------------------------------------------------------------------------------------------------------------------------------------------------------------------------------------------------------------------------------------------------------------------------------------------------------------------------------------------------------------------------------------------------------------------------------------------------------------------------------------|
| Age                                                  | Baseline questionnaire                                                                                                                  | Single year derived from date of birth                                                                                                                                         |                                                                                                                                                                                                                                                                                                                                                                                                                                                                                                   |
| Sex                                                  | Baseline questionnaire                                                                                                                  | Male / female                                                                                                                                                                  |                                                                                                                                                                                                                                                                                                                                                                                                                                                                                                   |
| Country of birth                                     | Baseline questionnaire                                                                                                                  | Australia & New Zealand<br>Other                                                                                                                                               |                                                                                                                                                                                                                                                                                                                                                                                                                                                                                                   |
| Remoteness                                           | Accessibility/Remoteness index of Australia, linked to study data by postcode of area of residence                                      | Metro<br>Inner regional<br>Outer regional / remote                                                                                                                             | Trewin D. Australian Standard Geographical Classification (ASGC). ABS Catalogue No 12160: Australian Bureau of Statistics; 2004.                                                                                                                                                                                                                                                                                                                                                                  |
| Socioeconomic status                                 | Australian Bureau of Statistics 2001 area level index of education and occupation linked to study data by postcode of area of residence | Least disadvantaged<br>2nd quartile<br>3rd quartile<br>Most disadvantaged                                                                                                      | Trewin D. Socio-Economic Indexes for Areas. Census of population and housing. Canberra, ACT: Australian Bureau of Statistics; 2001.                                                                                                                                                                                                                                                                                                                                                               |
| Attempts on driver test                              | NSW driver licencing data linked with survey data                                                                                       | Number of attempts                                                                                                                                                             |                                                                                                                                                                                                                                                                                                                                                                                                                                                                                                   |
| Crash before study                                   | Transport for NSW crash data linked with survey data                                                                                    | Yes / No                                                                                                                                                                       |                                                                                                                                                                                                                                                                                                                                                                                                                                                                                                   |
| Time on learners' licence                            | NSW driver licencing data linked with survey data                                                                                       | < 1 year<br>1-1.5 years<br>> 1.5 years                                                                                                                                         |                                                                                                                                                                                                                                                                                                                                                                                                                                                                                                   |
| Self-rated driving ability compared to other drivers | Baseline questionnaire                                                                                                                  | Five point Likert scale <ul style="list-style-type: none"> <li>• Much better</li> <li>• Better</li> <li>• Same</li> <li>• Worse</li> <li>• Much worse</li> </ul>               |                                                                                                                                                                                                                                                                                                                                                                                                                                                                                                   |
| Lessons with professional driving instructor (hours) | Baseline questionnaire                                                                                                                  | Number of lessons with professional driving instructor                                                                                                                         | Adapted from the Western Australian Young Driver Cohort Study and the University of Otago Young Driver Pilot Study.<br>Stevenson MR, Palamara P. Behavioural factors as predictors of motor vehicle crashes: differentials between young urban and rural drivers, Aust N Z J Public Health 2001;25:245–9.<br><br>Begg D, Brookland R, Hope J, et al. New Zealand drivers study: developing a methodology for conducting a follow-up study of newly licensed drivers. J Safety Res 2003;34:329–36. |
| Marijuana smoking in last 12 months                  | Baseline questionnaire                                                                                                                  | <ul style="list-style-type: none"> <li>• Never</li> <li>• Once a month or less</li> <li>• 2-4 times a month</li> <li>• 2-3 times per week</li> <li>• 4plus per week</li> </ul> | Centers for Disease Control and Prevention. Methodology of the youth risk behaviour surveillance system, Morb Mortal Wkly Rep, 2004;53:1–14                                                                                                                                                                                                                                                                                                                                                       |

| Variable                             | Source                 | Category / unit in the analysis                                                                                                                                                                                                                                                                                                                                                                                                                                                                                                                                                                                                                                                                                                                                                                                                                                                                                              | Reference                                                                                                                                                                                                                                                                                                                                                                                                                                                                                                                                                                                                                                                                |
|--------------------------------------|------------------------|------------------------------------------------------------------------------------------------------------------------------------------------------------------------------------------------------------------------------------------------------------------------------------------------------------------------------------------------------------------------------------------------------------------------------------------------------------------------------------------------------------------------------------------------------------------------------------------------------------------------------------------------------------------------------------------------------------------------------------------------------------------------------------------------------------------------------------------------------------------------------------------------------------------------------|--------------------------------------------------------------------------------------------------------------------------------------------------------------------------------------------------------------------------------------------------------------------------------------------------------------------------------------------------------------------------------------------------------------------------------------------------------------------------------------------------------------------------------------------------------------------------------------------------------------------------------------------------------------------------|
| Use of other drugs in last 12 months | Baseline questionnaire | <ul style="list-style-type: none"> <li>• Never</li> <li>• Once a month or less</li> <li>• 2-4 times a month</li> <li>• 2-3 times per week</li> <li>• 4plus per week</li> </ul>                                                                                                                                                                                                                                                                                                                                                                                                                                                                                                                                                                                                                                                                                                                                               | Centers for Disease Control and Prevention. Methodology of the youth risk behaviour surveillance system, <i>Morb Mortal Wkly Rep</i> , 2004;53:1–14.                                                                                                                                                                                                                                                                                                                                                                                                                                                                                                                     |
| Alcohol audit summary score          | Baseline questionnaire | <p>AUDIT-C, Alcohol Use Disorders Identification Test Consumption sub-scale. Summary score derived from the three alcohol audit questions grouped into 0-6 and &gt;6.</p> <p>1. How often do you have a drink containing alcohol?</p> <ul style="list-style-type: none"> <li>• Never</li> <li>• Once a month or less</li> <li>• 2-4 times a month</li> <li>• 2-3 times a week</li> <li>• 4 times a week or more</li> </ul> <p>2. How many drinks of alcohol would you have on a typical day when you are drinking?</p> <ul style="list-style-type: none"> <li>• 1 or 2</li> <li>• 3 or 4</li> <li>• 5 or 6</li> <li>• 7, 8 or 9</li> <li>• 10 or more</li> </ul> <p>3. How often would you have six or more drinks on one occasion?</p> <ul style="list-style-type: none"> <li>• Never</li> <li>• Once a month or less</li> <li>• 2-4 times a month</li> <li>• 2-3 times a week</li> <li>• 4 times a week or more</li> </ul> | <p>Babor TF, de la Fuente JR, Saunders J, et al. AUDIT: the Alcohol Use Disorders Identification Test, Guidelines for use in primary health care. Geneva: World Health Organization, 1992.</p> <p>Sayer GP, Britt H, Horn F, et al. Measures of health and health care delivery in general practice in Australia, AIHW catalogue number GEP-3. Canberra: The Australian Institute of Health and Welfare, 2000</p> <p>Bush K, Kivlahan DR, et al (1998). The AUDIT alcohol consumption questions (AUDIT-C): An effective brief screening test for problem drinking. <i>Ambulatory Care Quality Improvement Project (ACQUIP)</i>. <i>Arch Intern Med</i>. 158:1789-95.</p> |
| Self-harm                            | Baseline questionnaire | <p>Question related to self harm: "In the past 12 months have you ever deliberately hurt yourself or done anything that you knew might have harmed you or even killed you?"</p> <p>No<br/>Yes</p>                                                                                                                                                                                                                                                                                                                                                                                                                                                                                                                                                                                                                                                                                                                            | Patton GC, Hemphill SA, Beyers JM, et al. Pubertal stage and deliberate self-harm in adolescents. <i>J Am Acad Child Adolesc Psychiatry</i> 2007;46:508-14.                                                                                                                                                                                                                                                                                                                                                                                                                                                                                                              |
| Risk perception                      | Baseline questionnaire | <p>Summary score derived from 10 item scale measures on 4 point Likert scale (Always safe, mostly safe, sometimes safe, rarely safe) grouped into population tertiles (low, medium and high) for analysis</p> <p>10 items:</p> <ul style="list-style-type: none"> <li>• Driving with 2 or more passengers</li> <li>• Driving between midnight and 6 AM</li> <li>• Driving at 110 km/h in a 100-km/h zone</li> <li>• Driving at 70 km/h in a 60-km/h zone</li> <li>• Driving while talking on a mobile phone</li> <li>• Driving a poorly maintained car</li> <li>• Driving with a blood alcohol level just over the legal limit</li> </ul>                                                                                                                                                                                                                                                                                    | <p>Begg DJ, Brookland R, Hope J, Langley J, Broughton J. New Zealand drivers study: developing a methodology for conducting a follow-up study of newly licensed drivers. <i>J Safety Res</i>. 2003;34:329–336.</p> <p>Donovan J, Jessor R. Young Adult Driving Questionnaire. Boulder: Colorado Institute of Behavioral Science; 1992</p>                                                                                                                                                                                                                                                                                                                                |

| Variable          | Source                 | Category / unit in the analysis                                                                                                                                                                                                                                                                                                                                                                                                                                                                                                                                                                                                                                                                                                                                                                                                                                                                                                                                                                                                                                                                                                                                                                           | Reference                                                                                                                                                                                                                                                                                                    |
|-------------------|------------------------|-----------------------------------------------------------------------------------------------------------------------------------------------------------------------------------------------------------------------------------------------------------------------------------------------------------------------------------------------------------------------------------------------------------------------------------------------------------------------------------------------------------------------------------------------------------------------------------------------------------------------------------------------------------------------------------------------------------------------------------------------------------------------------------------------------------------------------------------------------------------------------------------------------------------------------------------------------------------------------------------------------------------------------------------------------------------------------------------------------------------------------------------------------------------------------------------------------------|--------------------------------------------------------------------------------------------------------------------------------------------------------------------------------------------------------------------------------------------------------------------------------------------------------------|
|                   |                        | <ul style="list-style-type: none"> <li>• Driving while using SMS on a mobile phone</li> <li>• Driving after smoking marijuana</li> <li>• Going through a red light</li> </ul>                                                                                                                                                                                                                                                                                                                                                                                                                                                                                                                                                                                                                                                                                                                                                                                                                                                                                                                                                                                                                             |                                                                                                                                                                                                                                                                                                              |
| Risk taking       | Baseline questionnaire | <p>Summary score derived from 14 item scale measures on 5 point Likert scale (Never, hardly ever, sometimes, often and very often) grouped into population tertiles (low, medium and high) for analysis</p> <p>10 items:</p> <ul style="list-style-type: none"> <li>• Drive fast just for the thrill of it</li> <li>• Take some risks when driving</li> <li>• Drive 70km/h in a 60km/h zone</li> <li>• Do burnouts, donuts, or skids</li> <li>• Speed up if someone is trying to pass you</li> <li>• Follow very close behind slower drivers</li> <li>• Make rude gestures at other drivers</li> <li>• Honk your horn or flash your lights</li> <li>• Race or drag race</li> <li>• Drive while talking on a mobile phone</li> <li>• Drive while listening to loud music</li> <li>• Drive with 2 or more passengers</li> <li>• Drive while using SMS on a mobile phone</li> <li>• Drive without wearing a seatbelt</li> </ul>                                                                                                                                                                                                                                                                              | Begg D, Brookland R, Hope J, Langley J, Broughton J. New Zealand drivers study: developing a methodology for conducting a follow-up study of newly licensed drivers. <i>Journal of safety research</i> 2003; 34(3): 329-36.                                                                                  |
| Sensation seeking | Baseline questionnaire | <p>Summary score derived from 20 item scale measures (Yes/No) grouped into population tertiles (low, medium and high) for analysis.</p> <ul style="list-style-type: none"> <li>• I tend to begin a new job without much advance</li> <li>• planning on how I will do it</li> <li>• I usually think about what I am going to do before I do it</li> <li>• I often do things on impulse</li> <li>• I very seldom spend much time on the details of planning ahead</li> <li>• I like to have new and exciting experiences and sensations even if they are a little frightening</li> <li>• Before I begin a complicated job, I make careful plans</li> <li>• I would like to take off on a trip with no pre-planned or definite routes or timetables</li> <li>• I enjoy getting into new situations where you can't predict how things will turn out</li> <li>• I like doing things just for the thrill of it</li> <li>• I tend to change interests frequently</li> <li>• I sometimes like to do things that are a little frightening</li> <li>• I'll try anything once</li> <li>• I would like the kind of life where one is on the move and travelling a lot, with lots of change and excitement</li> </ul> | <p>Impulsive Sensation Seeking Scale of the Zuckerman–Kuhlman Personality Questionnaire</p> <p>Zuckerman M, Kuhlman DM, Joireman J, et al. A comparison of the three structural models for personality: the big three, the big five, and the alternative five. <i>J Pers Soc Psychol</i> 1993;65:757–68.</p> |

| Variable         | Source                 | Category / unit in the analysis                                                                                                                                                                                                                                                                                                                                                                                                                                     | Reference                                                                                                                                                                                                                                                                                                                                                              |
|------------------|------------------------|---------------------------------------------------------------------------------------------------------------------------------------------------------------------------------------------------------------------------------------------------------------------------------------------------------------------------------------------------------------------------------------------------------------------------------------------------------------------|------------------------------------------------------------------------------------------------------------------------------------------------------------------------------------------------------------------------------------------------------------------------------------------------------------------------------------------------------------------------|
|                  |                        | <ul style="list-style-type: none"> <li>• I sometimes do 'crazy' things just for fun</li> <li>• I like to explore a strange city or section of town by myself, even if it means getting lost</li> <li>• I prefer friends who are excitingly unpredictable</li> <li>• I often get so carried away by new and exciting things that I never think of possible complications</li> <li>• I am an impulsive person</li> <li>• I like 'wild' uninhibited parties</li> </ul> |                                                                                                                                                                                                                                                                                                                                                                        |
| Driving exposure | Baseline questionnaire | During an average week, about how long (to the nearest hour) do you spend driving a car?                                                                                                                                                                                                                                                                                                                                                                            | Stevenson MR, Palamara P. Behavioural factors as predictors of motor vehicle crashes: differentials between young urban and rural drivers, Aust N Z J Public Health 2001;25:245–9.<br>Begg D, Brookland R, Hope J, et al. New Zealand drivers study: developing a methodology for conducting a follow-up study of newly licensed drivers. J Safety Res 2003;34:329–36. |

**Table supplement 2: Variables included in the different models to explore the relationship between driving offences (any offence, reckless driving, speeding, low speeding and others) during 2003/04-2006 and crash (any crash, crash resulting in hospital admission or death and single vehicle crash) during 2007-2016.**

| Model | Variables included                                                                                                                                                                                                                                                                                                                                                                                                                                                        |
|-------|---------------------------------------------------------------------------------------------------------------------------------------------------------------------------------------------------------------------------------------------------------------------------------------------------------------------------------------------------------------------------------------------------------------------------------------------------------------------------|
| M1*   | age, sex, socioeconomic status of area of residence (SEIFA index), remoteness of area of residence and average driving per week                                                                                                                                                                                                                                                                                                                                           |
| M2*   | age, sex, socioeconomic status of area of residence (SEIFA index), remoteness of area of residence average driving per week, cannabis smoking, alcohol consumption, drug use and self-harm                                                                                                                                                                                                                                                                                |
| M3*   | age, sex, socioeconomic status of area of residence (SEIFA index), remoteness of area of residence, average driving per week, risk perception score, risky driving score and sensation seeking score.                                                                                                                                                                                                                                                                     |
| M4*   | age, sex, socioeconomic status of area of residence (SEIFA index), remoteness of area of residence, average driving per week, self-rated driving ability, number of attempts on driver test, crash before start of follow up not related to driving offence, lessons with professional driving instructor and time on learner licence.                                                                                                                                    |
| M5*   | age, sex, socioeconomic status of area of residence (SEIFA index), remoteness of area of residence, average driving per week, cannabis smoking, alcohol consumption, drug use and self-harm, risk perception score, risky driving score, sensation seeking score, self-rated driving ability, number of attempts on driver test, crash before start of follow up not related to driving offence, lessons with professional driving instructor and time on learner licence |

\*adjusted for all other driving offences (calculated as number of any offence minus offence under investigation)

^ Variables were entered into the model in the format shown in Table 1

**Table supplement 3: Cohort characteristics by number of driving reckless driving related offences.\***

|                                                             |                  | None         | One         |              |
|-------------------------------------------------------------|------------------|--------------|-------------|--------------|
|                                                             |                  | Number (%)   | Number (%)  | Total        |
| <b>Sex</b>                                                  | Female           | 11005 (55.9) | 344 (31.6)  | 11349 (54.6) |
|                                                             | Male             | 8689 (44.1)  | 743 (68.4)  | 9432 (45.4)  |
| <b>Age (years)</b>                                          | 17               | 9480 (48.1)  | 638 (58.7)  | 10118 (48.7) |
|                                                             | 18-19            | 7374 (37.4)  | 354 (32.6)  | 7728 (37.2)  |
|                                                             | 20-25            | 2840 (14.4)  | 95 (8.7)    | 2935 (14.1)  |
| <b>Country of birth</b>                                     | Australia / NZ   | 16879 (87.3) | 982 (91.3)  | 17861 (87.5) |
|                                                             | Other            | 2456 (12.7)  | 94 (8.7)    | 2550 (12.5)  |
| <b>Area level SES</b>                                       | Least            | 4915 (25.0)  | 216 (19.9)  | 5131 (24.7)  |
|                                                             | Second quartile  | 4896 (24.9)  | 237 (21.8)  | 5133 (24.7)  |
|                                                             | Third quartile   | 5118 (26.0)  | 329 (30.3)  | 5447 (26.2)  |
|                                                             | Most             | 4765 (24.2)  | 305 (28.1)  | 5070 (24.4)  |
| <b>Remoteness</b>                                           | Metro            | 14674 (74.5) | 778 (71.6)  | 15452 (74.4) |
|                                                             | Inner regional   | 4136 (21.0)  | 252 (23.2)  | 4388 (21.1)  |
|                                                             | Outer regional / | 884 (4.5)    | 57 (5.2)    | 941 (4.5)    |
| <b>Attempts driver test</b>                                 | 1                | 12800 (65.2) | 672 (61.9)  | 13472 (65.0) |
|                                                             | 2                | 4689 (23.9)  | 267 (24.6)  | 4956 (23.9)  |
|                                                             | 3 or more        | 2139 (10.9)  | 146 (13.5)  | 2285 (11.0)  |
| <b>Time on I-Licence</b>                                    | < 1 year         | 7436 (37.9)  | 490 (45.2)  | 7926 (38.3)  |
|                                                             | 1-1.5 years      | 7004 (35.7)  | 400 (36.9)  | 7404 (35.8)  |
|                                                             | > 1.5 years      | 5176 (26.4)  | 194 (17.9)  | 5370 (25.9)  |
| <b>Crash before study</b>                                   | No               | 19168 (97.3) | 999 (91.9)  | 20167 (97.0) |
|                                                             | Yes              | 526 (2.7)    | 88 (8.1)    | 614 (3.0)    |
| <b>Self-rated driving ability compared to other drivers</b> | Much better      | 3467 (18.2)  | 261 (25.3)  | 3728 (18.6)  |
|                                                             | Better           | 8333 (43.8)  | 425 (41.2)  | 8758 (43.6)  |
|                                                             | Same             | 6910 (36.3)  | 332 (32.2)  | 7242 (36.1)  |
|                                                             | Worse or much    | 328 (1.7)    | 14 (1.4)    | 342 (1.7)    |
| <b>Marijuana smoking in last 12 months</b>                  | Never            | 16456 (86.5) | 807 (78.1)  | 17263 (86.1) |
|                                                             | Once a month or  | 1945 (10.2)  | 146 (14.1)  | 2091 (10.4)  |
|                                                             | 2-4 times a      | 359 (1.9)    | 41 (4.0)    | 400 (2.0)    |
|                                                             | 2-3 or 4plus per | 258 (1.4)    | 39 (3.8)    | 297 (1.5)    |
| <b>Use of other drugs in last 12 months</b>                 | Never            | 17716 (93.3) | 933 (90.8)  | 18649 (93.2) |
|                                                             | Once a month or  | 967 (5.1)    | 64 (6.2)    | 1031 (5.2)   |
|                                                             | 2-4 times a      | 212 (1.1)    | 24 (2.3)    | 236 (1.2)    |
|                                                             | 2-3 or 4plus per | 89 (0.5)     | 6 (0.6)     | 95 (0.5)     |
| <b>Alcohol audit summary score</b>                          | No               | 16620 (87.2) | 818 (78.9)  | 17438 (86.8) |
|                                                             | Yes              | 2437 (12.8)  | 219 (21.1)  | 2656 (13.2)  |
| <b>Self-harm</b>                                            | No               | 17096 (92.4) | 873 (87.4)  | 17969 (92.1) |
|                                                             | Yes              | 1414 (7.6)   | 126 (12.6)  | 1540 (7.9)   |
| <b>Risk Taking</b>                                          | Low              | 6645 (35.5)  | 205 (20.3)  | 6850 (34.7)  |
|                                                             | Medium           | 6161 (32.9)  | 290 (28.8)  | 6451 (32.7)  |
|                                                             | High             | 5938 (31.7)  | 513 (50.9)  | 6451 (32.7)  |
| <b>Risk perception</b>                                      | Low              | 5964 (32.0)  | 245 (24.4)  | 6209 (31.6)  |
|                                                             | Medium           | 5876 (31.5)  | 271 (27.0)  | 6147 (31.3)  |
|                                                             | High             | 6800 (36.5)  | 487 (48.6)  | 7287 (37.1)  |
| <b>Sensation score</b>                                      | Low              | 6059 (32.5)  | 198 (19.8)  | 6257 (31.9)  |
|                                                             | Medium           | 6076 (32.6)  | 310 (30.9)  | 6386 (32.5)  |
|                                                             | High             | 6501 (34.9)  | 494 (49.3)  | 6995 (35.6)  |
| <b>Average weekly driving (hours)</b>                       | Mean (SD)        | 8.5 (13.0)   | 12.5 (25.6) | 8.7 (13.9)   |
| <b>Lessons with professional driving instructor (hours)</b> | 0                | 3406 (17.3)  | 248 (22.8)  | 3654 (17.6)  |
|                                                             | 1-4              | 5584 (28.4)  | 325 (29.9)  | 5909 (28.4)  |
|                                                             | 5-8              | 4061 (20.6)  | 230 (21.2)  | 4291 (20.6)  |
|                                                             | 9+               | 6643 (33.7)  | 284 (26.1)  | 6927 (33.3)  |

\* Offences from joining DRIVE study in 2003/04 till end of 2006.

**Table supplement 4: Cohort characteristics by number of low speeding related offences.\***

|                                                             |                  | None<br>Number (%) | One<br>Number (%) | Total        |
|-------------------------------------------------------------|------------------|--------------------|-------------------|--------------|
| <b>Sex</b>                                                  | Female           | 10170 (55.4)       | 1179 (48.4)       | 11349 (54.6) |
|                                                             | Male             | 8176 (44.6)        | 1256 (51.6)       | 9432 (45.4)  |
| <b>Age (years)</b>                                          | 17               | 8840 (48.2)        | 1278 (52.5)       | 10118 (48.7) |
|                                                             | 18-19            | 6852 (37.3)        | 876 (36.0)        | 7728 (37.2)  |
|                                                             | 20-25            | 2654 (14.5)        | 281 (11.5)        | 2935 (14.1)  |
| <b>Country of birth</b>                                     | Australia / NZ   | 15687 (87.1)       | 2174 (90.4)       | 17861 (87.5) |
|                                                             | Other            | 2319 (12.9)        | 231 (9.6)         | 2550 (12.5)  |
| <b>Area level SES</b>                                       | Least            | 4621 (25.2)        | 510 (20.9)        | 5131 (24.7)  |
|                                                             | Second quartile  | 4517 (24.6)        | 616 (25.3)        | 5133 (24.7)  |
|                                                             | Third quartile   | 4772 (26.0)        | 675 (27.7)        | 5447 (26.2)  |
|                                                             | Most             | 4436 (24.2)        | 634 (26.0)        | 5070 (24.4)  |
| <b>Remoteness</b>                                           | Metro            | 13681 (74.6)       | 1771 (72.7)       | 15452 (74.4) |
|                                                             | Inner regional   | 3835 (20.9)        | 553 (22.7)        | 4388 (21.1)  |
|                                                             | Outer regional / | 830 (4.5)          | 111 (4.6)         | 941 (4.5)    |
| <b>Attempts driver test</b>                                 | 1                | 11913 (65.2)       | 1559 (64.2)       | 13472 (65.0) |
|                                                             | 2                | 4377 (23.9)        | 579 (23.8)        | 4956 (23.9)  |
|                                                             | 3 or more        | 1993 (10.9)        | 292 (12.0)        | 2285 (11.0)  |
| <b>Time on I-Licence</b>                                    | < 1 year         | 6899 (37.8)        | 1027 (42.3)       | 7926 (38.3)  |
|                                                             | 1-1.5 years      | 6536 (35.8)        | 868 (35.8)        | 7404 (35.8)  |
|                                                             | > 1.5 years      | 4838 (26.5)        | 532 (21.9)        | 5370 (25.9)  |
| <b>Crash before study</b>                                   | No               | 17932 (97.7)       | 2235 (91.8)       | 20167 (97.0) |
|                                                             | Yes              | 414 (2.3)          | 200 (8.2)         | 614 (3.0)    |
| <b>Self-rated driving ability compared to other drivers</b> | Much better      | 3258 (18.4)        | 470 (20.1)        | 3728 (18.6)  |
|                                                             | Better           | 7720 (43.5)        | 1038 (44.5)       | 8758 (43.6)  |
|                                                             | Same             | 6448 (36.4)        | 794 (34.0)        | 7242 (36.1)  |
|                                                             | Worse or much    | 309 (1.7)          | 33 (1.4)          | 342 (1.7)    |
| <b>Marijuana smoking in last 12 months</b>                  | Never            | 15383 (86.8)       | 1880 (80.6)       | 17263 (86.1) |
|                                                             | Once a month or  | 1781 (10.1)        | 310 (13.3)        | 2091 (10.4)  |
|                                                             | 2-4 times a      | 326 (1.8)          | 74 (3.2)          | 400 (2.0)    |
|                                                             | 2-3 or 4plus per | 229 (1.3)          | 68 (2.9)          | 297 (1.5)    |
| <b>Use of other drugs in last 12 months</b>                 | Never            | 16539 (93.5)       | 2110 (90.5)       | 18649 (93.2) |
|                                                             | Once a month or  | 876 (5.0)          | 155 (6.6)         | 1031 (5.2)   |
|                                                             | 2-4 times a      | 188 (1.1)          | 48 (2.1)          | 236 (1.2)    |
|                                                             | 2-3 or 4plus per | 77 (0.4)           | 18 (0.8)          | 95 (0.5)     |
| <b>Alcohol audit summary score</b>                          | No               | 15529 (87.4)       | 1909 (81.8)       | 17438 (86.8) |
|                                                             | Yes              | 2230 (12.6)        | 426 (18.2)        | 2656 (13.2)  |
| <b>Self-harm</b>                                            | No               | 15928 (92.3)       | 2041 (90.5)       | 17969 (92.1) |
|                                                             | Yes              | 1326 (7.7)         | 214 (9.5)         | 1540 (7.9)   |
| <b>Risk Taking</b>                                          | Low              | 6331 (36.2)        | 519 (22.7)        | 6850 (34.7)  |
|                                                             | Medium           | 5718 (32.7)        | 733 (32.1)        | 6451 (32.7)  |
|                                                             | High             | 5417 (31.0)        | 1034 (45.2)       | 6451 (32.7)  |
| <b>Risk perception</b>                                      | Low              | 5595 (32.2)        | 614 (27.0)        | 6209 (31.6)  |
|                                                             | Medium           | 5470 (31.5)        | 677 (29.8)        | 6147 (31.3)  |
|                                                             | High             | 6305 (36.3)        | 982 (43.2)        | 7287 (37.1)  |
| <b>Sensation score</b>                                      | Low              | 5726 (33.0)        | 531 (23.4)        | 6257 (31.9)  |
|                                                             | Medium           | 5672 (32.7)        | 714 (31.4)        | 6386 (32.5)  |
|                                                             | High             | 5969 (34.4)        | 1026 (45.2)       | 6995 (35.6)  |
| <b>Average weekly driving (hours)</b>                       | Mean (SD)        | 8.5 (14.1)         | 10.7 (12.9)       | 8.7 (13.9)   |
| <b>Lessons with professional driving instructor (hours)</b> | 0                | 3184 (17.4)        | 470 (19.3)        | 3654 (17.6)  |
|                                                             | 1-4              | 5172 (28.2)        | 737 (30.3)        | 5909 (28.4)  |
|                                                             | 5-8              | 3778 (20.6)        | 513 (21.1)        | 4291 (20.6)  |
|                                                             | 9+               | 6212 (33.9)        | 715 (29.4)        | 6927 (33.3)  |

\* Offences from joining DRIVE study in 2003/04 till end of 2006.

**Table supplement 5: Cohort characteristics by number of speeding related offences.\***

|                                                             |                         | None         | One         | Two         | Total      |
|-------------------------------------------------------------|-------------------------|--------------|-------------|-------------|------------|
|                                                             |                         | Number (%)   | Number (%)  | Number (%)  |            |
| <b>Sex</b>                                                  | Female                  | 9201 (58.7)  | 1703 (44.7) | 445 (34.5)  | 11,349     |
|                                                             | Male                    | 6483 (41.3)  | 2103 (55.3) | 846 (65.5)  | 9,432      |
| <b>Age (years)</b>                                          | 17                      | 7351 (46.9)  | 2064 (54.2) | 703 (54.5)  | 10,118     |
|                                                             | 18-19                   | 5905 (37.6)  | 1357 (35.7) | 466 (36.1)  | 7,728      |
|                                                             | 20-25                   | 2428 (15.5)  | 385 (10.1)  | 122 (9.5)   | 2,935      |
| <b>Country of birth</b>                                     | Australia / NZ          | 13347 (86.8) | 3366 (89.6) | 1148 (90.3) | 17,861     |
|                                                             | Other                   | 2037 (13.2)  | 390 (10.4)  | 123 (9.7)   | 2,550      |
| <b>Area level SES</b>                                       | Least disadvantaged     | 4072 (26.0)  | 814 (21.4)  | 245 (19.0)  | 5,131      |
|                                                             | Second quartile         | 3855 (24.6)  | 942 (24.8)  | 336 (26.0)  | 5,133      |
|                                                             | Third quartile          | 4017 (25.6)  | 1049 (27.6) | 381 (29.5)  | 5,447      |
|                                                             | Most disadvantaged      | 3740 (23.8)  | 1001 (26.3) | 329 (25.5)  | 5,070      |
| <b>Remoteness</b>                                           | Metro                   | 11711 (74.7) | 2782 (73.1) | 959 (74.3)  | 15,452     |
|                                                             | Inner regional          | 3263 (20.8)  | 844 (22.2)  | 281 (21.8)  | 4,388      |
|                                                             | Outer regional / remote | 710 (4.5)    | 180 (4.7)   | 51 (4.0)    | 941        |
| <b>Attempts driver test</b>                                 | 1                       | 10214 (65.4) | 2473 (65.1) | 785 (60.9)  | 13,472     |
|                                                             | 2                       | 3714 (23.8)  | 907 (23.9)  | 335 (26.0)  | 4,956      |
|                                                             | 3 or more               | 1701 (10.9)  | 416 (11.0)  | 168 (13.0)  | 2,285      |
| <b>Time on I-Licence</b>                                    | < 1 year                | 5682 (36.4)  | 1666 (43.9) | 578 (44.9)  | 7,926      |
|                                                             | 1-1.5 years             | 5586 (35.8)  | 1353 (35.7) | 465 (36.2)  | 7,404      |
|                                                             | > 1.5 years             | 4352 (27.9)  | 775 (20.4)  | 243 (18.9)  | 5,370      |
| <b>Crash before study</b>                                   | No                      | 15464 (98.6) | 3527 (92.7) | 1176 (91.1) | 20,167     |
|                                                             | Yes                     | 220 (1.4)    | 279 (7.3)   | 115 (8.9)   | 614        |
| <b>Self-rated driving ability compared to other drivers</b> | Much better             | 2634 (17.3)  | 797 (21.8)  | 297 (24.0)  | 3,728      |
|                                                             | Better                  | 6614 (43.6)  | 1600 (43.8) | 544 (44.0)  | 8,758      |
|                                                             | Same                    | 5657 (37.3)  | 1212 (33.2) | 373 (30.2)  | 7,242      |
|                                                             | worse or much worse     | 278 (1.8)    | 42 (1.2)    | 22 (1.8)    | 342        |
| <b>Marijuana smoking in last 12 months</b>                  | Never                   | 13310 (87.7) | 3023 (82.9) | 930 (75.5)  | 17,263     |
|                                                             | Once a month or less    | 1434 (9.5)   | 455 (12.5)  | 202 (16.4)  | 2,091      |
|                                                             | 2-4 times a month       | 250 (1.6)    | 99 (2.7)    | 51 (4.1)    | 400        |
|                                                             | 2-3 or 4plus per week   | 178 (1.2)    | 70 (1.9)    | 49 (4.0)    | 297        |
| <b>Use of other drugs in last 12 months</b>                 | Never                   | 14231 (94.0) | 3331 (91.6) | 1087 (88.5) | 18,649     |
|                                                             | Once a month or less    | 706 (4.7)    | 232 (6.4)   | 93 (7.6)    | 1,031      |
|                                                             | 2-4 times a month       | 148 (1.0)    | 54 (1.5)    | 34 (2.8)    | 236        |
|                                                             | 2-3 or 4plus per week   | 61 (0.4)     | 20 (0.5)    | 14 (1.1)    | 95         |
| <b>Alcohol audit summary score</b>                          | No                      | 13456 (88.5) | 3014 (82.5) | 968 (78.3)  | 17,438     |
|                                                             | Yes                     | 1749 (11.5)  | 638 (17.5)  | 269 (21.7)  | 2,656      |
| <b>Self-harm</b>                                            | No                      | 13718 (92.8) | 3205 (90.3) | 1046 (88.4) | 17,969     |
|                                                             | Yes                     | 1060 (7.2)   | 343 (9.7)   | 137 (11.6)  | 1,540      |
| <b>Risk Taking</b>                                          | Low                     | 5840 (39.0)  | 809 (22.6)  | 201 (16.6)  | 6,850      |
|                                                             | Medium                  | 4971 (33.2)  | 1154 (32.2) | 326 (26.9)  | 6,451      |
|                                                             | High                    | 4146 (27.7)  | 1618 (45.2) | 687 (56.6)  | 6,451      |
| <b>Risk perception</b>                                      | Low                     | 5015 (33.7)  | 927 (26.0)  | 267 (22.2)  | 6,209      |
|                                                             | Medium                  | 4753 (32.0)  | 1085 (30.4) | 309 (25.7)  | 6,147      |
|                                                             | High                    | 5105 (34.3)  | 1554 (43.6) | 628 (52.2)  | 7,287      |
| <b>Sensation score</b>                                      | Low                     | 5170 (34.7)  | 842 (23.7)  | 245 (20.4)  | 6,257      |
|                                                             | Medium                  | 4902 (32.9)  | 1142 (32.1) | 342 (28.5)  | 6,386      |
|                                                             | High                    | 4810 (32.3)  | 1571 (44.2) | 614 (51.1)  | 6,995      |
| <b>Average weekly</b>                                       | Mean (SD)               | 8.0 (13.0)   | 10.4 (16.8) | 12.7 (14.3) | 8.7 (13.9) |
| <b>Lessons with professional driving instructor (hours)</b> | 0                       | 2643 (16.9)  | 729 (19.2)  | 282 (21.8)  | 3,654      |
|                                                             | 1-4                     | 4317 (27.5)  | 1191 (31.3) | 401 (31.1)  | 5,909      |
|                                                             | 5-8                     | 3224 (20.6)  | 833 (21.9)  | 234 (18.1)  | 4,291      |
|                                                             | 9+                      | 5500 (35.1)  | 1053 (27.7) | 374 (29.0)  | 6,927      |

\* Offences from joining DRIVE study in 2003/04 till end of 2006.

**Table supplement 6: Cohort characteristics by number of other driving offences.\***

|                                                             |                  | None<br>Number (%) | One<br>Number (%) | Total        |
|-------------------------------------------------------------|------------------|--------------------|-------------------|--------------|
| <b>Sex</b>                                                  | Female           | 9812 (58.3)        | 1537 (38.8)       | 11349 (54.6) |
|                                                             | Male             | 7010 (41.7)        | 2422 (61.2)       | 9432 (45.4)  |
| <b>Age (years)</b>                                          | 17               | 8137 (48.4)        | 1981 (50.0)       | 10118 (48.7) |
|                                                             | 18-19            | 6265 (37.2)        | 1463 (37.0)       | 7728 (37.2)  |
|                                                             | 20-25            | 2420 (14.4)        | 515 (13.0)        | 2935 (14.1)  |
| <b>Country of birth</b>                                     | Australia / NZ   | 14428 (87.4)       | 3433 (88.2)       | 17861 (87.5) |
|                                                             | Other            | 2089 (12.6)        | 461 (11.8)        | 2550 (12.5)  |
| <b>Area level SES</b>                                       | Least            | 4294 (25.5)        | 837 (21.1)        | 5131 (24.7)  |
|                                                             | Second quartile  | 4178 (24.8)        | 955 (24.1)        | 5133 (24.7)  |
|                                                             | Third quartile   | 4310 (25.6)        | 1137 (28.7)       | 5447 (26.2)  |
|                                                             | Most             | 4040 (24.0)        | 1030 (26.0)       | 5070 (24.4)  |
| <b>Remoteness</b>                                           | Metro            | 12513 (74.4)       | 2939 (74.2)       | 15452 (74.4) |
|                                                             | Inner regional   | 3542 (21.1)        | 846 (21.4)        | 4388 (21.1)  |
|                                                             | Outer regional / | 767 (4.6)          | 174 (4.4)         | 941 (4.5)    |
| <b>Attempts driver test</b>                                 | 1                | 11023 (65.7)       | 2449 (62.0)       | 13472 (65.0) |
|                                                             | 2                | 3967 (23.7)        | 989 (25.1)        | 4956 (23.9)  |
|                                                             | 3 or more        | 1776 (10.6)        | 509 (12.9)        | 2285 (11.0)  |
| <b>Time on I-Licence</b>                                    | < 1 year         | 6259 (37.4)        | 1667 (42.3)       | 7926 (38.3)  |
|                                                             | 1-1.5 years      | 6056 (36.1)        | 1348 (34.2)       | 7404 (35.8)  |
|                                                             | > 1.5 years      | 4441 (26.5)        | 929 (23.6)        | 5370 (25.9)  |
| <b>Crash before study</b>                                   | No               | 16501 (98.1)       | 3666 (92.6)       | 20167 (97.0) |
|                                                             | Yes              | 321 (1.9)          | 293 (7.4)         | 614 (3.0)    |
| <b>Self-rated driving ability compared to other drivers</b> | Much better      | 2805 (17.2)        | 923 (24.3)        | 3728 (18.6)  |
|                                                             | Better           | 7099 (43.6)        | 1659 (43.8)       | 8758 (43.6)  |
|                                                             | Same             | 6085 (37.4)        | 1157 (30.5)       | 7242 (36.1)  |
|                                                             | Worse or much    | 289 (1.8)          | 53 (1.4)          | 342 (1.7)    |
| <b>Marijuana smoking in last 12 months</b>                  | Never            | 14237 (87.5)       | 3026 (80.0)       | 17263 (86.1) |
|                                                             | Once a month or  | 1573 (9.7)         | 518 (13.7)        | 2091 (10.4)  |
|                                                             | 2-4 times a      | 274 (1.7)          | 126 (3.3)         | 400 (2.0)    |
|                                                             | 2-3 or 4plus per | 185 (1.1)          | 112 (3.0)         | 297 (1.5)    |
| <b>Use of other drugs in last 12 months</b>                 | Never            | 15277 (94.1)       | 3372 (89.4)       | 18649 (93.2) |
|                                                             | Once a month or  | 747 (4.6)          | 284 (7.5)         | 1031 (5.2)   |
|                                                             | 2-4 times a      | 152 (0.9)          | 84 (2.2)          | 236 (1.2)    |
|                                                             | 2-3 or 4plus per | 63 (0.4)           | 32 (0.8)          | 95 (0.5)     |
| <b>Alcohol audit summary score</b>                          | No               | 14341 (88.0)       | 3097 (81.6)       | 17438 (86.8) |
|                                                             | Yes              | 1956 (12.0)        | 700 (18.4)        | 2656 (13.2)  |
| <b>Self-harm</b>                                            | No               | 14663 (92.6)       | 3306 (89.9)       | 17969 (92.1) |
|                                                             | Yes              | 1168 (7.4)         | 372 (10.1)        | 1540 (7.9)   |
| <b>Risk Taking</b>                                          | Low              | 5997 (37.4)        | 853 (22.9)        | 6850 (34.7)  |
|                                                             | Medium           | 5290 (33.0)        | 1161 (31.1)       | 6451 (32.7)  |
|                                                             | High             | 4733 (29.5)        | 1718 (46.0)       | 6451 (32.7)  |
| <b>Risk perception</b>                                      | Low              | 5260 (33.0)        | 949 (25.7)        | 6209 (31.6)  |
|                                                             | Medium           | 5071 (31.8)        | 1076 (29.1)       | 6147 (31.3)  |
|                                                             | High             | 5617 (35.2)        | 1670 (45.2)       | 7287 (37.1)  |
| <b>Sensation score</b>                                      | Low              | 5425 (34.0)        | 832 (22.5)        | 6257 (31.9)  |
|                                                             | Medium           | 5234 (32.8)        | 1152 (31.2)       | 6386 (32.5)  |
|                                                             | High             | 5285 (33.1)        | 1710 (46.3)       | 6995 (35.6)  |
| <b>Average weekly</b>                                       | Mean (SD)        | 8.0 (12.5)         | 11.7 (18.6)       | 8.7 (13.9)   |
| <b>Lessons with professional driving instructor (hours)</b> | 0                | 2805 (16.7)        | 849 (21.4)        | 3654 (17.6)  |
|                                                             | 1-4              | 4719 (28.1)        | 1190 (30.1)       | 5909 (28.4)  |
|                                                             | 5-8              | 3539 (21.0)        | 752 (19.0)        | 4291 (20.6)  |
|                                                             | 9+               | 5759 (34.2)        | 1168 (29.5)       | 6927 (33.3)  |

\* Offences from joining DRIVE study in 2003/04 till end of 2006.



**Table supplement 7: Rate ratios<sup>#</sup> of any crash, hospitalised crash or death and single vehicle crash during 2007-2016 by type of driving offence 2003-2006.**

|                       |                                |               | M1 demographics<br>and driving<br>exposure<br>RR (95% CI) | M2 M1 +drugs &<br>self-harm<br>RR (95% CI) | M3 M1+risk-<br>taking<br>RR (95% CI) | M4 M1+ Training<br>/ experience /<br>previous crash<br>RR (95% CI) | M5 Fully<br>adjusted<br>RR (95% CI) |                  |
|-----------------------|--------------------------------|---------------|-----------------------------------------------------------|--------------------------------------------|--------------------------------------|--------------------------------------------------------------------|-------------------------------------|------------------|
| Any crash             | Any offence                    | One           | 1.34 (1.22-1.48)                                          | 1.35 (1.23-1.49)                           | 1.34 (1.22-1.48)                     | 1.34 (1.22-1.48)                                                   | 1.35 (1.22-1.49)                    |                  |
|                       |                                | Two           | 1.48 (1.30-1.69)                                          | 1.50 (1.32-1.71)                           | 1.49 (1.31-1.70)                     | 1.48 (1.30-1.69)                                                   | 1.50 (1.31-1.71)                    |                  |
|                       |                                | Three or more | 2.22 (1.96-2.52)                                          | 2.26 (1.99-2.57)                           | 2.25 (1.98-2.56)                     | 2.22 (1.95-2.52)                                                   | 2.25 (1.98-2.57)                    |                  |
|                       | Reckless driving*              | One or more   | 1.35 (1.18-1.56)                                          | 1.36 (1.18-1.56)                           | 1.36 (1.18-1.57)                     | 1.35 (1.18-1.56)                                                   | 1.35 (1.17-1.56)                    |                  |
|                       | Speeding*                      | One           | 1.24 (1.12-1.36)                                          | 1.24 (1.13-1.37)                           | 1.24 (1.12-1.37)                     | 1.24 (1.12-1.36)                                                   | 1.24 (1.13-1.37)                    |                  |
|                       |                                | Two or more   | 1.57 (1.37-1.81)                                          | 1.59 (1.38-1.83)                           | 1.59 (1.38-1.83)                     | 1.57 (1.36-1.81)                                                   | 1.59 (1.38-1.83)                    |                  |
|                       | Low speeding offence*          | One or more   | 1.06 (0.95-1.19)                                          | 1.07 (0.95-1.20)                           | 1.07 (0.95-1.20)                     | 1.06 (0.95-1.19)                                                   | 1.07 (0.95-1.20)                    |                  |
|                       | Other offences*                | One or more   | 1.42 (1.27-1.60)                                          | 1.43 (1.27-1.60)                           | 1.43 (1.27-1.60)                     | 1.42 (1.27-1.59)                                                   | 1.43 (1.28-1.61)                    |                  |
|                       | Hospitalised crash or<br>death | Any offence   | One                                                       | 1.52 (0.99-2.34)                           | 1.52 (0.99-2.35)                     | 1.52 (0.98-2.36)                                                   | 1.51 (0.98-2.34)                    | 1.52 (0.97-2.36) |
|                       |                                |               | Two                                                       | 1.75 (0.98-3.11)                           | 1.76 (0.98-3.14)                     | 1.75 (0.98-3.14)                                                   | 1.76 (0.98-3.16)                    | 1.76 (0.98-3.18) |
| Three or more         |                                |               | 2.83 (1.58-5.05)                                          | 2.88 (1.59-5.22)                           | 2.85 (1.59-5.12)                     | 2.81 (1.58-4.98)                                                   | 2.87 (1.60-5.17)                    |                  |
| Reckless driving*     |                                | One or more   | 3.00 (1.81-4.95)                                          | 2.98 (1.80-4.93)                           | 3.05 (1.85-5.03)                     | 2.99 (1.82-4.92)                                                   | 3.00 (1.83-4.92)                    |                  |
| Speeding*             |                                | One           | 1.07 (0.67-1.72)                                          | 1.08 (0.67-1.73)                           | 1.08 (0.67-1.73)                     | 1.08 (0.67-1.73)                                                   | 1.09 (0.68-1.74)                    |                  |
|                       |                                | Two or more   | 1.43 (0.75-2.71)                                          | 1.44 (0.75-2.76)                           | 1.47 (0.77-2.78)                     | 1.43 (0.76-2.72)                                                   | 1.47 (0.77-2.79)                    |                  |
| Low speeding offence* |                                | One or more   | 1.34 (0.82-2.18)                                          | 1.35 (0.83-2.20)                           | 1.34 (0.83-2.17)                     | 1.33 (0.82-2.15)                                                   | 1.33 (0.82-2.16)                    |                  |
| Other offences*       |                                | One or more   | 1.71 (1.01-2.89)                                          | 1.72 (1.02-2.92)                           | 1.71 (1.01-2.90)                     | 1.70 (1.01-2.88)                                                   | 1.77 (1.06-2.96)                    |                  |
| Single vehicle crash  |                                | Any offence   | One                                                       | 1.59 (1.17-2.17)                           | 1.61 (1.18-2.19)                     | 1.61 (1.18-2.20)                                                   | 1.60 (1.17-2.19)                    | 1.62 (1.18-2.23) |
|                       |                                |               | Two                                                       | 1.94 (1.32-2.86)                           | 1.98 (1.34-2.92)                     | 2.01 (1.36-2.97)                                                   | 1.95 (1.32-2.88)                    | 2.03 (1.36-3.01) |
|                       | Three or more                  |               | 3.16 (2.22-4.52)                                          | 3.19 (2.21-4.59)                           | 3.31 (2.31-4.76)                     | 3.19 (2.24-4.53)                                                   | 3.28 (2.28-4.72)                    |                  |
|                       | Reckless driving*              | One or more   | 1.32 (0.88-1.99)                                          | 1.31 (0.87-1.97)                           | 1.35 (0.90-2.03)                     | 1.32 (0.88-1.99)                                                   | 1.32 (0.88-1.99)                    |                  |
|                       | Speeding*                      | One           | 1.39 (1.03-1.86)                                          | 1.40 (1.04-1.88)                           | 1.41 (1.04-1.90)                     | 1.39 (1.03-1.88)                                                   | 1.42 (1.05-1.92)                    |                  |
|                       |                                | Two or more   | 1.86 (1.26-2.74)                                          | 1.87 (1.26-2.77)                           | 1.91 (1.29-2.84)                     | 1.87 (1.27-2.75)                                                   | 1.92 (1.29-2.85)                    |                  |
|                       | Low speeding offence*          | One or more   | 1.04 (0.74-1.46)                                          | 1.04 (0.74-1.46)                           | 1.06 (0.75-1.48)                     | 1.05 (0.75-1.47)                                                   | 1.05 (0.75-1.48)                    |                  |
|                       | Other offences*                | One or more   | 1.90 (1.37-2.64)                                          | 1.89 (1.35-2.63)                           | 1.93 (1.38-2.69)                     | 1.90 (1.36-2.64)                                                   | 1.90 (1.36-2.66)                    |                  |

<sup>#</sup>Model adjusted for<sup>a</sup>

M1: age, sex, socioeconomic status of area of residence (SEIFA index), remoteness of area of residence and average driving per week

M2: age, sex, socioeconomic status of area of residence (SEIFA index), remoteness of area of residence average driving per week, cannabis smoking, alcohol consumption, drug use and self-harm

M3: age, sex, socioeconomic status of area of residence (SEIFA index), remoteness of area of residence, average driving per week, risk perception score, risky driving score and sensation seeking score.

M4: age, sex, socioeconomic status of area of residence (SEIFA index), remoteness of area of residence, average driving per week, self-rated driving ability, number of attempts on driver test, crash before start of follow up not related to driving offence, lessons with professional driving instructor and time on learner licence.

M5: age, sex, socioeconomic status of area of residence (SEIFA index), remoteness of area of residence, average driving per week, cannabis smoking, alcohol consumption, drug use and self-harm, risk perception score, risky driving score, sensation seeking score, self-rated driving ability, number of attempts on driver test, crash before start of follow up not related to driving offence, lessons with professional driving instructor and time on learner licence

<sup>a</sup>adjusted for all other driving offences (calculated as number of any offence minus offence under investigation)
